# Supplementary material for: Diversity awareness perceptions among classified staff at a Midwestern Land Grant University
Source: MDPI journal article supplement (doi:10.3390/toxins13120836), 2011-01-01
Supplement: s1 [file s1]

# Supplementary Materials: Isoflavones in Animals: Metabolism and Effects in Livestock and Occurrence in Feed

Dino Grgic, Elisabeth Varga, Barbara Novak, Anneliese Müller and Doris Marko

## Content:

|                                                                                       |         |
|---------------------------------------------------------------------------------------|---------|
| <b>Table S1:</b> Occurrence of ISF and ZEN in pig feed (Spectrum 380®).               | Page 2  |
| <b>Table S2:</b> Occurrence of ISF and ZEN in pig - boar feed (Spectrum 380®).        | Page 3  |
| <b>Table S3:</b> Occurrence of ISF and ZEN in pig - finisher feed (Spectrum 380®).    | Page 4  |
| <b>Table S4:</b> Occurrence of ISF and ZEN in pig - grower feed (Spectrum 380®).      | Page 5  |
| <b>Table S5:</b> Occurrence of ISF and ZEN in pig - piglet feed (Spectrum 380®).      | Page 6  |
| <b>Table S6:</b> Occurrence of ISF and ZEN in pig - sow feed (Spectrum 380®).         | Page 7  |
| <b>Table S7:</b> Occurrence of ISF and ZEN in poultry feed (Spectrum 380®).           | Page 8  |
| <b>Table S8:</b> Occurrence of ISF and ZEN in poultry - breeder feed (Spectrum 380®). | Page 9  |
| <b>Table S9:</b> Occurrence of ISF and ZEN in poultry – broiler feed (Spectrum 380®). | Page 10 |
| <b>Table S10:</b> Occurrence of ISF and ZEN in poultry – layer feed (Spectrum 380®).  | Page 11 |
| <b>Table S11:</b> Occurrence of ISF and ZEN in poultry - turkey feed (Spectrum 380®). | Page 12 |

**Table S12:** Occurrence of ISF and ZEN in pig feed (Spectrum 380®). Please note that ZEN and ZEN-metabolite concentrations are provided in µg/kg whereas the ISF as feed constituents occur in higher concentrations and are reported in mg/kg (factor 1000 higher).

|                                                | Pig (n=463) |       |         |       |          |       |          |        |        |      |
|------------------------------------------------|-------------|-------|---------|-------|----------|-------|----------|--------|--------|------|
|                                                | Biochanin A | DAI   | Daidzin | GEN   | Genistin | GLY   | Glycitin | α-ZEL* | β-ZEL* | ZEN* |
| Positive samples (n)                           | 14          | 46    | 66      | 52    | 53       | 32    | 37       | 5      | 4      | 78   |
| Positive samples (%)                           | 3%          | 10%   | 14%     | 11%   | 11%      | 7%    | 8%       | 1%     | 1%     | 17%  |
| Mean (mg/kg)                                   | 22.8        | 8.79  | 34.6    | 13.4  | 60.9     | 9.64  | 35.2     | 48.7   | 13.8   | 318  |
| Maximum (mg/kg)                                | 316         | 47.4  | 358     | 140   | 436      | 163   | 118      | 105    | 36.0   | 9905 |
| Third quartile (mg/kg)                         | 0.032       | 17.5  | 77.0    | 18.1  | 126      | 9.00  | 75.4     | 65.1   | 14.3   | 50.1 |
| Median (mg/kg)                                 | 0.016       | 1.50  | 0.218   | 0.920 | 1.58     | 2.58  | 16.6     | 55.8   | 6.94   | 13.1 |
| First quartile (mg/kg)                         | 0.011       | 0.059 | 0.038   | 0.031 | 0.092    | 0.320 | 0.171    | 10.0   | 6.44   | 4.38 |
| Concentration ratio ZEN/ISF                    | 0.01        | 0.04  | 0.009   | 0.02  | 0.005    | 0.03  | 0.009    |        |        |      |
| Co-occurrence of ISF and ZEN (n)               | 4.0         | 16.0  | 26.0    | 16.0  | 20.0     | 11.0  | 16.0     |        |        |      |
| Co-occurrence of ISF and ZEN<br>(% of samples) | 0.9         | 3.5   | 5.6     | 3.5   | 4.3      | 2.4   | 3.5      |        |        |      |

Mycotoxins marked with \* are reported in µg/kg; LOQ = limit of quantification; Q1 = first quartile; Q3 = third quartile; ISF = isoflavone; ZEN = Zearalenone; α-ZEL = α-Zearalenol; β-ZEL = β-Zearalenol; DAI = Daidzein; GEN = Genistein; GLY = Glycitein.

**Table S13:** Occurrence of ISF and ZEN in pig - boar feed (Spectrum 380®). Please note that ZEN and ZEN-metabolite concentrations are provided in µg/kg whereas the ISF as feed constituents occur in higher concentrations and are reported in mg/kg (factor 1000 higher).

|                                             | Pig - Boar (n=7) |        |         |        |          |        |          |      |
|---------------------------------------------|------------------|--------|---------|--------|----------|--------|----------|------|
|                                             | Biochanin A      | DAI    | Daidzin | GEN    | Genistin | GLY    | Glycitin | ZEN* |
| Positive samples (n)                        | 2                | 7      | 7       | 7      | 7        | 6      | 7        | 5    |
| Positive samples (%)                        | 29%              | 100%   | 100%    | 100%   | 100%     | 86%    | 100%     | 71%  |
| Mean (mg/kg)                                | 0.013            | 9.31   | 78.4    | 17.7   | 101      | 4.59   | 40.9     | 4.09 |
| Maximum (mg/kg)                             | 0.015            | 32.3   | 208     | 58.9   | 247      | 15.3   | 83.6     | 12.1 |
| Third quartile (mg/kg)                      | 0.014            | 8.39   | 105     | 16.4   | 136      | 3.58   | 61.5     | 2.53 |
| Median (mg/kg)                              | 0.013            | 7.04   | 49.5    | 15.3   | 70.3     | 2.95   | 39.2     | 2.36 |
| First quartile (mg/kg)                      | 0.012            | 4.46   | 40.0    | 8.50   | 58.0     | 2.33   | 20.2     | 2.27 |
| Concentration ratio ZEN/ISF                 | 0.3              | 0.0004 | 0.0001  | 0.0002 | 0.00004  | 0.0009 | 0.0001   |      |
| Co-occurrence of ISF and ZEN (n)            | 0                | 5      | 5       | 5      | 5        | 4      | 5        |      |
| Co-occurrence of ISF and ZEN (% of samples) | 0                | 71     | 71      | 71     | 71       | 57     | 71       |      |

Mycotoxins marked with \* are reported in µg/kg; LOQ = limit of quantification; Q1 = first quartile; Q3 = third quartile; ISF = isoflavone; ZEN = Zearalenone; DAI = Daidzein; GEN = Genistein; GLY = Glycitein.

**Table S14:** Occurrence of ISF and ZEN in pig - finisher feed (Spectrum 380®). Please note that ZEN and ZEN-metabolite concentrations are provided in µg/kg whereas the ISF as feed constituents occur in higher concentrations and are reported in mg/kg (factor 1000 higher).

|                                             | Pig - Finisher (n=10) |       |         |       |          |       |          |      |
|---------------------------------------------|-----------------------|-------|---------|-------|----------|-------|----------|------|
|                                             | Biochanin A           | DAI   | Daidzin | GEN   | Genistin | GLY   | Glycitin | ZEN* |
| Positive samples (n)                        | 1                     | 8     | 8       | 10    | 10       | 8     | 8        | 9    |
| Positive samples (%)                        | 10%                   | 80%   | 80%     | 100%  | 100%     | 80%   | 80%      | 90%  |
| Mean (mg/kg)                                | 0.022                 | 12.4  | 24.8    | 13.4  | 26.7     | 2.21  | 4.71     | 18.5 |
| Maximum (mg/kg)                             | 0.022                 | 21.1  | 92.1    | 28.9  | 120      | 4.47  | 20.2     | 62.2 |
| Third quartile (mg/kg)                      | 0.022                 | 16.3  | 46.4    | 21.4  | 45.0     | 3.00  | 6.34     | 14.8 |
| Median (mg/kg)                              | 0.022                 | 12.4  | 0.86    | 11.6  | 1.31     | 2.44  | 0.170    | 7.48 |
| First quartile (mg/kg)                      | 0.022                 | 7.21  | 0.35    | 7.80  | 0.577    | 0.948 | 0.137    | 3.06 |
| Concentration ratio ZEN/ISF                 | 0.830                 | 0.001 | 0.001   | 0.001 | 0.001    | 0.008 | 0.004    |      |
| Co-occurrence of ISF and ZEN (n)            | 7                     | 9     | 9       | 9     | 9        | 7     | 7        |      |
| Co-occurrence of ISF and ZEN (% of samples) | 70                    | 90    | 90      | 90    | 90       | 70    | 70       |      |

Mycotoxins marked with \* are reported in µg/kg; LOQ = limit of quantification; Q1 = first quartile; Q3 = third quartile; ISF = isoflavone; ZEN = Zearalenone; DAI = Daidzein; GEN = Genistein; GLY = Glycitein.

**Table S15:** Occurrence of ISF and ZEN in pig - grower feed (Spectrum 380®). Please note that ZEN and ZEN-metabolite concentrations are provided in µg/kg whereas the ISF as feed constituents occur in higher concentrations and are reported in mg/kg (factor 1000 higher).

|                                                | Pig - Grower (n=33) |       |         |              |       |          |       |          |      |
|------------------------------------------------|---------------------|-------|---------|--------------|-------|----------|-------|----------|------|
|                                                | Biochanin A         | DAI   | Daidzin | Formononetin | GEN   | Genistin | GLY   | Glycitin | ZEN* |
| Positive samples (n)                           | 3                   | 22    | 20      | 1            | 21    | 20       | 17    | 18       | 22   |
| Positive samples (%)                           | 9%                  | 67%   | 61%     | 3%           | 64%   | 61%      | 52%   | 55%      | 67%  |
| Mean (mg/kg)                                   | 0.216               | 5.41  | 32.3    | 0.241        | 8.85  | 47.6     | 8.66  | 19.7     | 28.2 |
| Maximum (mg/kg)                                | 0.636               | 24.6  | 111     | 0.241        | 34.9  | 175      | 121   | 96.3     | 37.3 |
| Third quartile (mg/kg)                         | 0.324               | 8.23  | 44      | 0.241        | 15.7  | 63.4     | 3.33  | 18.1     | 163  |
| Median (mg/kg)                                 | 0.011               | 3.81  | 30.0    | 0.241        | 4.86  | 43.1     | 1.59  | 12.8     | 38.3 |
| First quartile (mg/kg)                         | 0.006               | 0.206 | 8.37    | 0.241        | 0.914 | 11.1     | 0.385 | 8.29     | 17.4 |
| Concentration ratio ZEN/ISF                    | 0.13                | 0.005 | 0.001   | 0.12         | 0.003 | 0.001    | 0.003 | 0.001    |      |
| Co-occurrence of ISF and ZEN (n)               | 1                   | 15    | 13      | 0            | 14    | 12       | 10    | 11       |      |
| Co-occurrence of ISF and ZEN<br>(% of samples) | 3                   | 45    | 39      | 0            | 42    | 36       | 30    | 33       |      |

Mycotoxins marked with \* are reported in µg/kg; LOQ = limit of quantification; Q1 = first quartile; Q3 = third quartile; ISF = isoflavone; ZEN = Zearalenone; DAI = Daidzein; GEN = Genistein; GLY = Glycitein.

**Table S16:** Occurrence of ISF and ZEN in pig - piglet feed (Spectrum 380®). Please note that ZEN and ZEN-metabolite concentrations are provided in µg/kg whereas the ISF as feed constituents occur in higher concentrations and are reported in mg/kg (factor 1000 higher).

| Pig - Piglet (n=175)                           |             |       |         |              |       |          |       |          |        |      |
|------------------------------------------------|-------------|-------|---------|--------------|-------|----------|-------|----------|--------|------|
|                                                | Biochanin A | DAI   | Daidzin | Formononetin | GEN   | Genistin | GLY   | Glycitin | β-ZEL* | ZEN* |
| Positive samples (n)                           | 33          | 120   | 125     | 12           | 123   | 123      | 113   | 120      | 1      | 151  |
| Positive samples (%)                           | 19%         | 69%   | 71%     | 7%           | 70%   | 70%      | 65%   | 69%      | 1%     | 86%  |
| Mean (mg/kg)                                   | 0.039       | 5.45  | 47.1    | 1.37         | 9.07  | 64.6     | 2.07  | 16.3     | 23.8   | 43.1 |
| Maximum (mg/kg)                                | 0.614       | 23.6  | 118     | 15.7         | 36.9  | 160      | 24.9  | 86.0     | 23.8   | 595  |
| Third quartile (mg/kg)                         | 0.011       | 8.42  | 72.9    | 0.062        | 12.4  | 94.2     | 2.16  | 21.6     | 23.8   | 35.2 |
| Median (mg/kg)                                 | 0.004       | 3.90  | 41.4    | 0.052        | 6.71  | 64.9     | 0.986 | 14.9     | 23.8   | 12.6 |
| First quartile (mg/kg)                         | 0.003       | 2.29  | 28.2    | 0.031        | 3.48  | 40.7     | 0.594 | 8.56     | 23.8   | 6    |
| Concentration ratio ZEN/ISF                    | 1.1         | 0.008 | 0.001   | 0.03         | 0.005 | 0.001    | 0.02  | 0.003    |        |      |
| Co-occurrence of ISF and ZEN (n)               | 30          | 108   | 108     | 11           | 109   | 106      | 105   | 107      |        |      |
| Co-occurrence of ISF and ZEN<br>(% of samples) | 17          | 62    | 62      | 6            | 62    | 61       | 60    | 61       |        |      |

Mycotoxins marked with \* are reported in µg/kg; LOQ = limit of quantification; Q1 = first quartile; Q3 = third quartile; ISF = isoflavone; ZEN = Zearalenone; β-ZEL = β-Zearalenol; DAI = Daidzein; GEN = Genistein; GLY = Glycitein.

**Table S17:** Occurrence of ISF and ZEN in pig - sow feed (Spectrum 380®). Please note that ZEN and ZEN-metabolite concentrations are provided in µg/kg whereas the ISF as feed constituents occur in higher concentrations and are reported in mg/kg (factor 1000 higher).

| Fig - Sow (n=172)                              |             |       |         |              |      |          |       |          |        |        |      |
|------------------------------------------------|-------------|-------|---------|--------------|------|----------|-------|----------|--------|--------|------|
|                                                | Biochanin A | DAI   | Daidzin | Formononetin | GEN  | Genistin | GLY   | Glycitin | α-ZEL* | β-ZEL* | ZEN* |
| Positive samples (n)                           | 25          | 131   | 136     | 3            | 132  | 138      | 127   | 126      | 6      | 9      | 125  |
| Positive samples (%)                           | 15%         | 76%   | 79%     | 2%           | 77%  | 80%      | 74%   | 73%      | 3%     | 5%     | 73%  |
| Mean (mg/kg)                                   | 0.181       | 5.00  | 36.9    | 3.30         | 6.82 | 66.0     | 1.12  | 15.2     | 5.31   | 7.95   | 100  |
| Maximum (mg/kg)                                | 2.89        | 61.9  | 354     | 9.83         | 91.2 | 442      | 10.2  | 101      | 13.8   | 15.0   | 3262 |
| Third quartile (mg/kg)                         | 0.019       | 4.44  | 46.9    | 4.95         | 6.20 | 70.3     | 1.13  | 17.7     | 4.92   | 13.3   | 42.3 |
| Median (mg/kg)                                 | 0.008       | 2.41  | 29.6    | 0.061        | 2.92 | 40.5     | 0.499 | 9.85     | 4.87   | 6.96   | 17.3 |
| First quartile (mg/kg)                         | 0.002       | 0.828 | 8.55    | 0.040        | 1.31 | 11.1     | 0.194 | 3.61     | 2.59   | 3.46   | 6.20 |
| Concentration ratio ZEN/ISF                    | 0.6         | 0.02  | 0.003   | 0.03         | 0.01 | 0.002    | 0.09  | 0.007    |        |        |      |
| Co-occurrence of ISF and ZEN (n)               | 20          | 6     | 0       | 0            | 19   | 6        | 0     | 0        |        |        |      |
| Co-occurrence of ISF and ZEN<br>(% of samples) | 12          | 3     | 0       | 0            | 11   | 3        | 0     | 0        |        |        |      |

Mycotoxins marked with \* are reported in µg/kg; LOQ = limit of quantification; Q1 = first quartile; Q3 = third quartile; ISF = isoflavone; ZEN = Zearalenone; α-ZEL = α-Zearalenol; β-ZEL = β-Zearalenol; DAI = Daidzein; GEN = Genistein; GLY = Glycitein.

**Table S18:** Occurrence of ISF and ZEN in poultry feed (Spectrum 380®). Please note that ZEN and ZEN-metabolite concentrations are provided in µg/kg whereas the ISF as feed constituents occur in higher concentrations and are reported in mg/kg (factor 1000 higher).

|                                                | Poultry (n=63) |       |         |       |          |       |          |        |        |      |
|------------------------------------------------|----------------|-------|---------|-------|----------|-------|----------|--------|--------|------|
|                                                | Biochanin A    | DAI   | Daidzin | GEN   | Genistin | GLY   | Glycitin | α-ZEL* | β-ZEL* | ZEN* |
| Positive samples (n)                           | 2              | 42    | 50      | 45    | 49       | 37    | 38       | 2      | 1      | 37   |
| Positive samples (%)                           | 3%             | 67%   | 79%     | 71%   | 78%      | 59%   | 60%      | 3%     | 2%     | 59%  |
| Mean (mg/kg)                                   | 0.003          | 9.62  | 62.8    | 12.4  | 95.4     | 3.24  | 45.7     | 9.23   | 55.8   | 42.8 |
| Maximum (mg/kg)                                | 0.004          | 29.4  | 315     | 38.7  | 449      | 9.32  | 127      | 11.5   | 55.8   | 486  |
| Third quartile (mg/kg)                         | 0.003          | 15.4  | 93.9    | 21.0  | 143      | 4.97  | 79.9     | 10.4   | 55.8   | 46.9 |
| Median (mg/kg)                                 | 0.003          | 10.9  | 65.6    | 12.3  | 95.4     | 2.79  | 41.8     | 9.23   | 55.8   | 25.9 |
| First quartile (mg/kg)                         | 0.002          | 0.174 | 0.252   | 0.115 | 0.281    | 0.911 | 3.05     | 8.09   | 55.8   | 7.02 |
| Concentration ratio ZEN/ISF                    | 16             | 0.004 | 0.001   | 0.003 | 0.0004   | 0.013 | 0.001    |        |        |      |
| Co-occurrence of ISF and ZEN (n)               | 1.0            | 30.0  | 33.0    | 31.0  | 33.0     | 28.0  | 29.0     |        |        |      |
| Co-occurrence of ISF and ZEN<br>(% of samples) | 1.6            | 47.6  | 52.4    | 49.2  | 52.4     | 44.4  | 46.0     |        |        |      |

Mycotoxins marked with \* are reported in µg/kg; LOQ = limit of quantification; Q1 = first quartile; Q3 = third quartile; ISF = isoflavone; ZEN = Zearalenone; α-ZEL = α-Zearalenol; β-ZEL = β-Zearalenol; DAI = Daidzein; GEN = Genistein; GLY = Glycitein.



**Table S19:** Occurrence of ISF and ZEN in poultry - breeder feed (Spectrum 380®). Please note that ZEN and ZEN-metabolite concentrations are provided in µg/kg whereas the ISF as feed constituents occur in higher concentrations and are reported in mg/kg (factor 1000 higher).

|                                             | Poultry -Breeder (n=31) |         |       |          |       |          |        |        |      |
|---------------------------------------------|-------------------------|---------|-------|----------|-------|----------|--------|--------|------|
|                                             | DAI                     | Daidzin | GEN   | Genistin | GLY   | Glycitin | α-ZEL* | β-ZEL* | ZEN* |
| Positive samples (n)                        | 18                      | 21      | 20    | 25       | 15    | 16       | 3      | 4      | 17   |
| Positive samples (%)                        | 58%                     | 68%     | 65%   | 81%      | 48%   | 52%      | 10%    | 13%    | 55%  |
| Mean (mg/kg)                                | 9.4                     | 61.2    | 15.8  | 76.0     | 5.91  | 18.4     | 3.22   | 6.11   | 105  |
| Maximum (mg/kg)                             | 53.7                    | 342     | 102   | 465      | 37.2  | 93.3     | 4.97   | 14.5   | 724  |
| Third quartile (mg/kg)                      | 7.19                    | 46.2    | 12.5  | 76.3     | 2.28  | 25.5     | 4.24   | 8.58   | 120  |
| Median (mg/kg)                              | 4.23                    | 29.3    | 9.62  | 18.4     | 1.76  | 7.23     | 3.50   | 4.41   | 38.0 |
| First quartile (mg/kg)                      | 1.88                    | 0.803   | 1.43  | 0.206    | 0.391 | 1.51     | 2.35   | 1.94   | 10.1 |
| Concentration ratio ZEN/ISF                 | 0.01                    | 0.002   | 0.007 | 0.001    | 0.02  | 0.006    |        |        |      |
| Co-occurrence of ISF and ZEN (n)            | 12                      | 14      | 13    | 14       | 9     | 10       |        |        |      |
| Co-occurrence of ISF and ZEN (% of samples) | 39                      | 45      | 42    | 45       | 29    | 32       |        |        |      |

Mycotoxins marked with \* are reported in µg/kg; LOQ = limit of quantification; Q1 = first quartile; Q3 = third quartile; ISF = isoflavone; ZEN = Zearalenone; α-ZEL = α-Zearalenol; β-ZEL = β-Zearalenol; DAI = Daidzein; GEN = Genistein; GLY = Glycitein.

**Table S20:** Occurrence of ISF and ZEN in poultry – broiler feed (Spectrum 380®). Please note that ZEN and ZEN-metabolite concentrations are provided in µg/kg whereas the ISF as feed constituents occur in higher concentrations and are reported in mg/kg (factor 1000 higher).

|                                                | Poultry - Broiler (n=124) |       |         |              |       |          |      |          |        |        |      |
|------------------------------------------------|---------------------------|-------|---------|--------------|-------|----------|------|----------|--------|--------|------|
|                                                | Biochanin A               | DAI   | Daidzin | Formononetin | GEN   | Genistin | GLY  | Glycitin | α-ZEL* | β-ZEL* | ZEN* |
| Positive samples (n)                           | 11                        | 89    | 100     | 2            | 96    | 101      | 84   | 87       | 3      | 8      | 91   |
| Positive samples (%)                           | 9%                        | 72%   | 81%     | 2%           | 77%   | 81%      | 68%  | 70%      | 2%     | 6%     | 73%  |
| Mean (mg/kg)                                   | 0.019                     | 7.45  | 61.8    | 0.237        | 10.2  | 83.6     | 2.78 | 24.0     | 1.63   | 2.66   | 44.8 |
| Maximum (mg/kg)                                | 0.124                     | 34.2  | 216     | 0.306        | 38.5  | 292      | 18.9 | 100      | 2.27   | 5.83   | 873  |
| Third quartile (mg/kg)                         | 0.012                     | 9.86  | 90.4    | 0.271        | 14.7  | 119      | 3.02 | 34.7     | 1.92   | 3.60   | 39.7 |
| Median (mg/kg)                                 | 0.009                     | 7.15  | 43.0    | 0.237        | 9.39  | 66.0     | 1.94 | 23.6     | 1.57   | 1.73   | 14.0 |
| First quartile (mg/kg)                         | 0.006                     | 3.55  | 29.0    | 0.202        | 4.53  | 40.9     | 1.24 | 7.68     | 1.32   | 1.35   | 7.46 |
| Concentration ratio ZEN/ISF                    | 2.4                       | 0.006 | 0.001   | 0.2          | 0.004 | 0.001    | 0.02 | 0.002    |        |        |      |
| Co-occurrence of ISF and ZEN (n)               | 10                        | 77    | 79      | 1            | 80    | 82       | 71   | 73       |        |        |      |
| Co-occurrence of ISF and ZEN<br>(% of samples) | 8                         | 62    | 64      | 1            | 65    | 66       | 57   | 59       |        |        |      |

Mycotoxins marked with \* are reported in µg/kg; LOQ = limit of quantification; Q1 = first quartile; Q3 = third quartile; ISF = isoflavone; ZEN = Zearalenone; α-ZEL = α-Zearalenol; β-ZEL = β-Zearalenol; DAI = Daidzein; GEN = Genistein; GLY = Glycitein.

**Table S21:** Occurrence of ISF and ZEN in poultry – layer feed (Spectrum 380®). Please note that ZEN and ZEN-metabolite concentrations are provided in µg/kg whereas the ISF as feed constituents occur in higher concentrations and are reported in mg/kg (factor 1000 higher).

|                                             | Poultry - Layer (n=38) |         |       |          |       |          |        |        |      |
|---------------------------------------------|------------------------|---------|-------|----------|-------|----------|--------|--------|------|
|                                             | DAI                    | Daidzin | GEN   | Genistin | GLY   | Glycitin | α-ZEL* | β-ZEL* | ZEN* |
| Positive samples (n)                        | 23                     | 29      | 26    | 32       | 19    | 23       | 2      | 5      | 27   |
| Positive samples (%)                        | 61%                    | 76%     | 68%   | 84%      | 50%   | 61%      | 5%     | 13%    | 71%  |
| Mean (mg/kg)                                | 2.92                   | 25.0    | 3.89  | 33.3     | 0.867 | 10.7     | 10.1   | 15.0   | 70.8 |
| Maximum (mg/kg)                             | 15.0                   | 184     | 21.3  | 280      | 6.29  | 101      | 12.6   | 58.7   | 389  |
| Third quartile (mg/kg)                      | 3.14                   | 31.2    | 4.99  | 44.0     | 0.667 | 9.36     | 11.4   | 6.23   | 106  |
| Median (mg/kg)                              | 2.15                   | 13.7    | 2.83  | 12.6     | 0.463 | 4.41     | 10.1   | 5.67   | 27.8 |
| First quartile (mg/kg)                      | 0.587                  | 0.387   | 0.152 | 0.370    | 0.155 | 0.534    | 8.86   | 2.48   | 5.37 |
| Concentration ratio ZEN/ISF                 | 0.02                   | 0.003   | 0.02  | 0.002    | 0.08  | 0.007    |        |        |      |
| Co-occurrence of ISF and ZEN (n)            | 20                     | 25      | 22    | 25       | 18    | 21       |        |        |      |
| Co-occurrence of ISF and ZEN (% of samples) | 53                     | 66      | 58    | 66       | 47    | 55       |        |        |      |

Mycotoxins marked with \* are reported in µg/kg; LOQ = limit of quantification; Q1 = first quartile; Q3 = third quartile; ISF = isoflavone; ZEN = Zearalenone; α-ZEL = α-Zearalenol; β-ZEL = β-Zearalenol; DAI = Daidzein; GEN = Genistein; GLY = Glycitein.

**Table S22:** Occurrence of ISF and ZEN in poultry - turkey feed (Spectrum 380®). Please note that ZEN and ZEN-metabolite concentrations are provided in µg/kg whereas the ISF as feed constituents occur in higher concentrations and are reported in mg/kg (factor 1000 higher).

|                                             | Poultry - Turkey (n=7) |         |       |          |       |          |      |
|---------------------------------------------|------------------------|---------|-------|----------|-------|----------|------|
|                                             | DAI                    | Daidzin | GEN   | Genistin | GLY   | Glycitin | ZEN* |
| Positive samples (n)                        | 4                      | 5       | 4     | 5        | 4     | 4        | 4    |
| Positive samples (%)                        | 57%                    | 71%     | 57%   | 71%      | 57%   | 57%      | 57%  |
| Mean (mg/kg)                                | 7.38                   | 67.9    | 10.3  | 98.7     | 1.65  | 31.9     | 10.7 |
| Maximum (mg/kg)                             | 18.6                   | 169     | 25.5  | 193      | 4.55  | 56.1     | 22.0 |
| Third quartile (mg/kg)                      | 8.99                   | 96.3    | 11.5  | 191      | 1.79  | 47.5     | 17.6 |
| Median (mg/kg)                              | 4.89                   | 42.7    | 6.75  | 70.6     | 0.867 | 30.4     | 9.80 |
| First quartile (mg/kg)                      | 3.29                   | 32.1    | 5.58  | 38.7     | 0.723 | 14.7     | 2.88 |
| Concentration ratio ZEN/ISF                 | 0.001                  | 0.0002  | 0.001 | 0.0001   | 0.006 | 0.0003   |      |
| Co-occurrence of ISF and ZEN (n)            | 3                      | 3       | 3     | 3        | 3     | 3        |      |
| Co-occurrence of ISF and ZEN (% of samples) | 50                     | 50      | 50    | 50       | 50    | 50       |      |

Mycotoxins marked with \* are reported in µg/kg; LOQ = limit of quantification; Q1 = first quartile; Q3 = third quartile; ISF = isoflavone; ZEN = Zearalenone; α-ZEL = α-Zearalenol; β-ZEL = β-Zearalenol; DAI = Daidzein; GEN = Genistein; GLY = Glycitein.
